# Supplementary material for: Masked Arginine Vasopressin Deficiency in a Kidney Transplant Recipient With Posttransplant Lymphoproliferative Disorder
Source: PubMed Central journal article supplement — Kidney Int Rep. 2024 Jun 27;9(9):2832–4. doi: 10.1016/j.ekir.2024.06.029 (PMC11403074; doi:10.1016/j.ekir.2024.06.029), 2024-06-27
Supplement: mmc1.pdf [file mmc1.pdf]

## Supplementary Materials Index

- Supplementary Table S1. Serum and urine lab results preceding and following diagnosis of AVP-D
- Supplementary Figure S1. MRI brain images before and after therapy
- Supplementary Figure S2. Histopathology of tumor biopsy

**Supplementary Table S1.** Serum and urine lab results preceding and following diagnosis of central diabetes insipidus.

| Labs                                               | Values       | Normal Ranges      |
|----------------------------------------------------|--------------|--------------------|
| Serum sodium on presentation                       | 136 mmol/dL  | 135-145 mmol/dL    |
| 24H urine output on presentation                   | 2.7 L        | ---                |
| Serum sodium post glucocorticoid                   | 143 mmol/dL  | 135-145 mmol/dL    |
| 24H urine output post glucocorticoid               | 5.8-10.1 L   | ---                |
| <b>Desmopressin Test</b>                           |              |                    |
| UOsm at 0 minutes                                  | 126 mOsm/kg  | 50 to 1200 mOsm/kg |
| UOsm at 30 minutes                                 | 168 mOsm/kg  | 50 to 1200 mOsm/kg |
| UOsm at 60 minutes                                 | 406 mOsm/kg  | 50 to 1200 mOsm/kg |
| UOsm at 120 minutes                                | 253 mOsm/kg  | 50 to 1200 mOsm/kg |
| Copeptin                                           | < 2.8 pmol/L | 2.8 – 11.3 pmol/L  |
| Serum sodium on desmopressin                       | 137 mmol/dL  | 135-145 mmol/dL    |
| 24H urine output on desmopressin                   | 2.0 L        | ---                |
| Serum sodium on desmopressin and high dose MTX     | 129 mmol/dL  | 135-145 mmol/dL    |
| 24H urine output on desmopressin and high dose MTX | 2.3 L        | ---                |

Abbreviations: UOsm: urine osmolality, MTX: methotrexate

**Supplementary Figure S1**

**A**

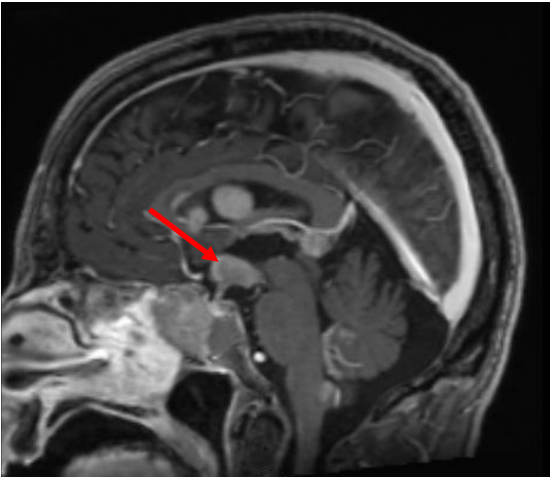

**B**

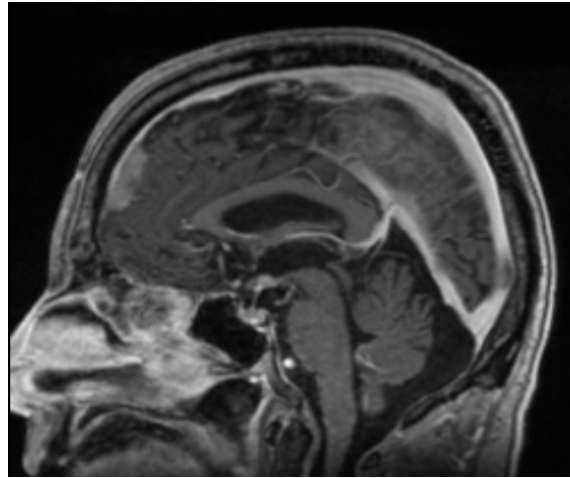

**Supplementary Figure S1:** MRI brain images before and after therapy. A, MRI brain sagittal with gadolinium contrast before treatment, demonstrated enlargement and enhancement of the hypophysis (arrow). B, MRI brain with gadolinium contrast after treatment demonstrated decreased size of enhancing foci in the left peri ventricular region.

**Supplementary Figure S2**

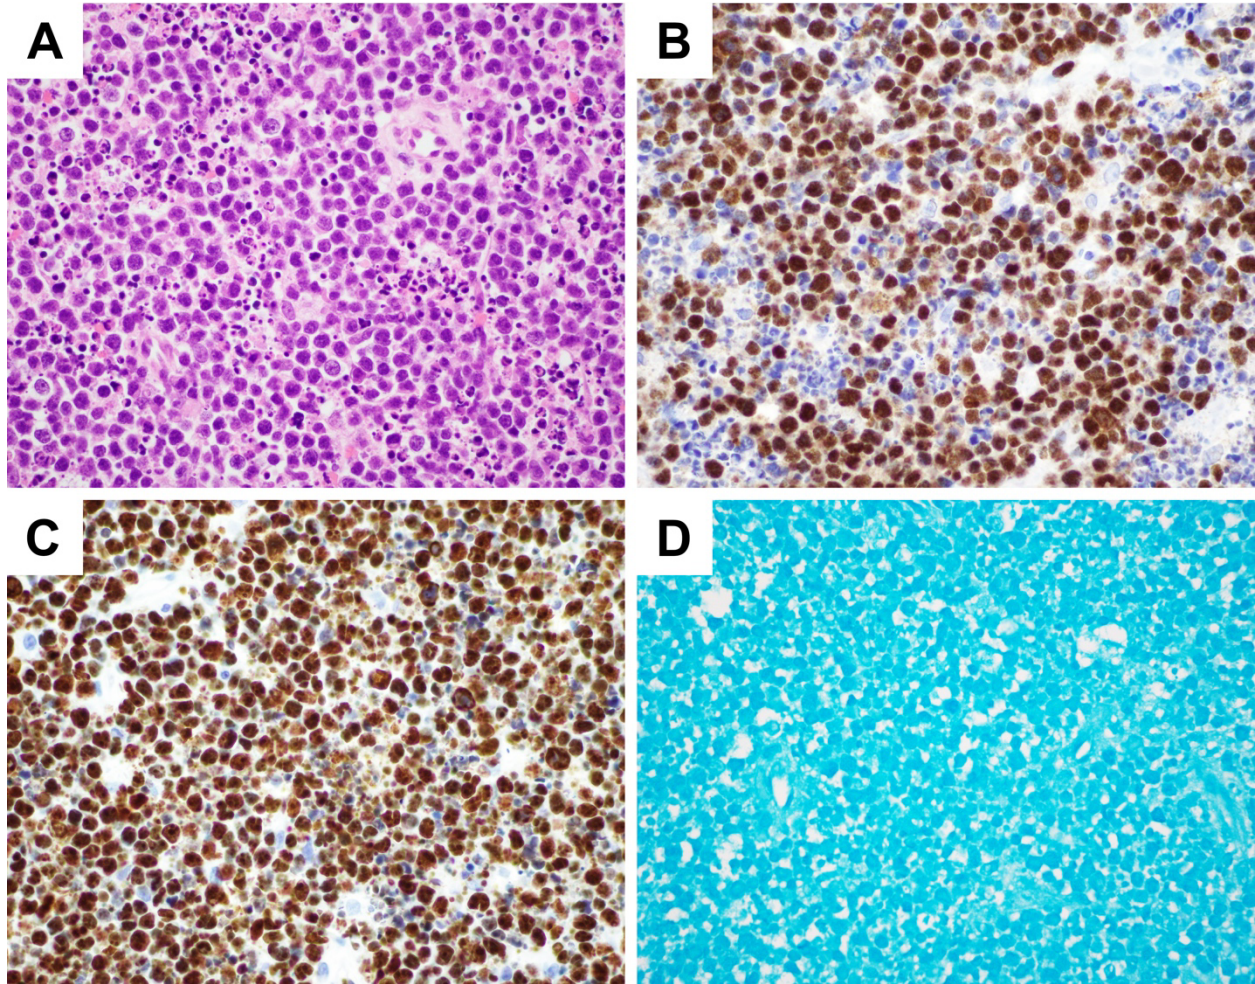

**Supplementary Figure S2: Histopathology of tumor biopsy.** A, H&E stained photomicrograph of the left sphenoid mass shows a diffuse infiltrate of atypical intermediate-sized cells with abundant apoptotic debris. B, the tumor cells are positive for B cell transcription factor PAX5 by immunohistochemistry. C, the tumor shows very high proliferation rate by Ki67 immunostaining. D, in situ hybridization for EBV encoded RNA shows absence of EBV infection.
